# Supplementary material for: Production of extracellular amylase contributes to the colonization of Bacillus cereus 0-9 in wheat roots
Source: Research Square preprint supplement (doi:10.21203/rs.3.rs-1379395/v1), 2022-02-28
Supplement: Supplementary file 1 [file dc80170d0425e366708f11e8.pdf]

1 **Supplementary information**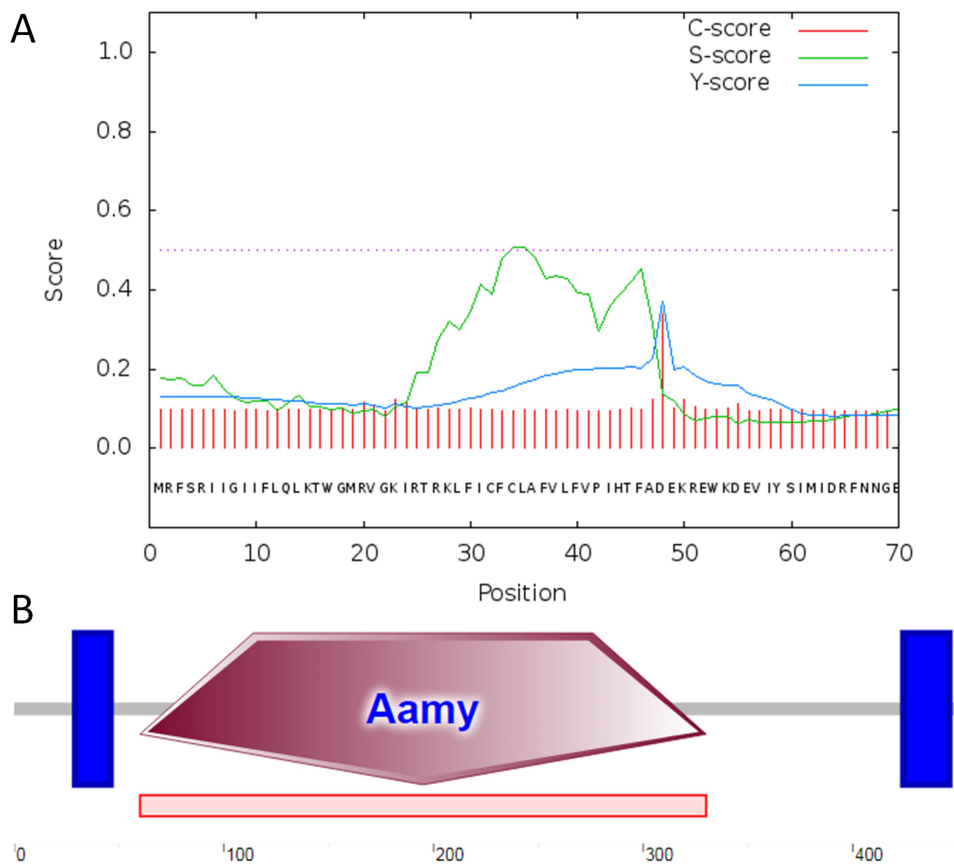

2

3 **Fig. S1:** Analysis the *amyC* gene (FRY47\_05825) signal peptide and smart domain4 (A) Analysis the AmyC protein signal peptide through SignalP 4.1. S-score: Each  
5 amino acid corresponds to 1 S value, with a high S value in the signal peptide region.

6 C-score: Each amino acid will have a C value, with the highest C value at the shear

7 site. Y-score: Y value is a parameter considering S value and C value, which is

8 accurate than C value alone, because there may be more than one higher C value in a  
9 series, but only one shear site; the shear site is with steep S value and high C value.

10 (B) Analysis the AmyC protein smart domain through SMART software. The 60-330

11 position is catalytic activity, and there are two transmembrane areas at each end of the

12 active area.

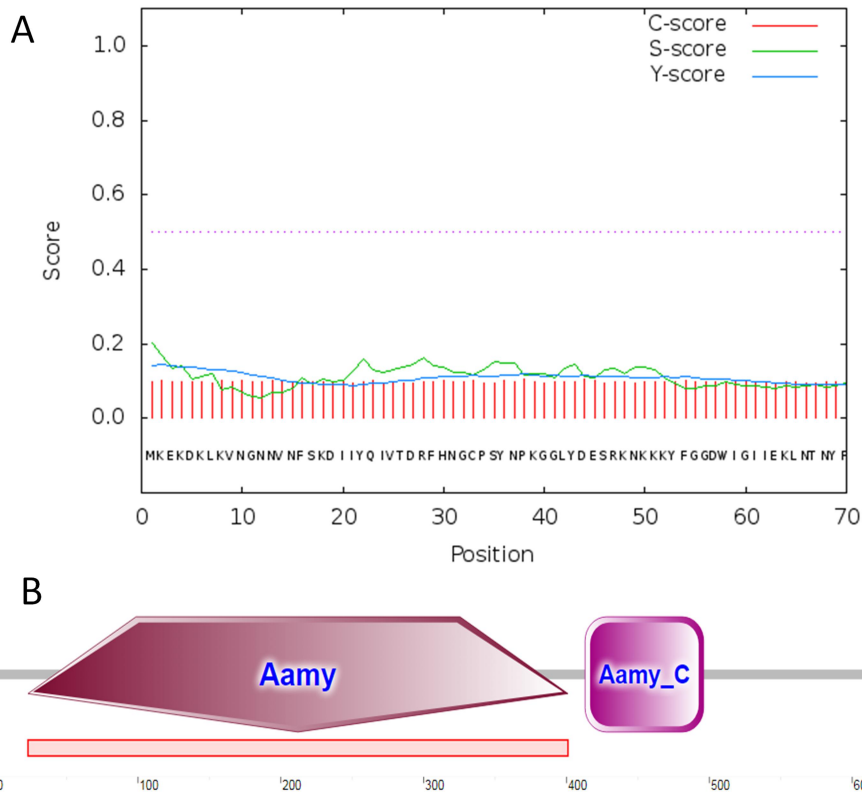

13

14 **Fig. S2:** Analysis the *amyP* gene (FRY47\_27030) signal peptide and smart domain.15 (A) Analysis the AmyP protein signal peptide through SignalP 4.1. S-score: Each  
16 amino acid corresponds to 1 S value, with a high S value in the signal peptide region.

17 C-score: Each amino acid will have a C value, with the highest C value at the shear

18 site. Y-score: Y value is a parameter considering S value and C value, which is

19 accurate than C value alone, because there may be more than one higher C value in a  
20 series, but only one shear site; the shear site is with steep S value and high C value.

21 (B) Analysis the AmyP protein smart domain through SMART software. The 23 to

22 401 is the catalytic activity, 413 to 496 is the C domain of Amy, 501 to 577 is the

23 TIG domain, 585 to 681 is the domain of CBM 20, which has starch binding function.

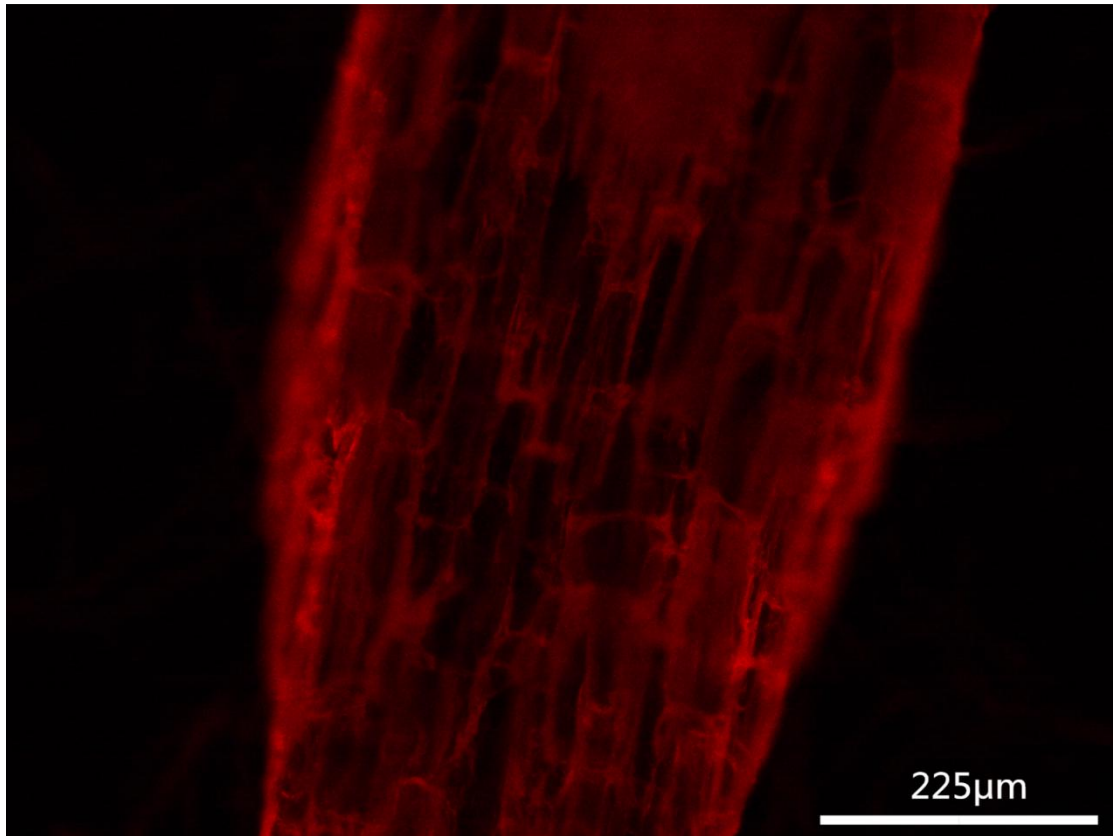

24

25 **Fig. S3:** No strains colonization on wheat root (control treatment)

26

27

28

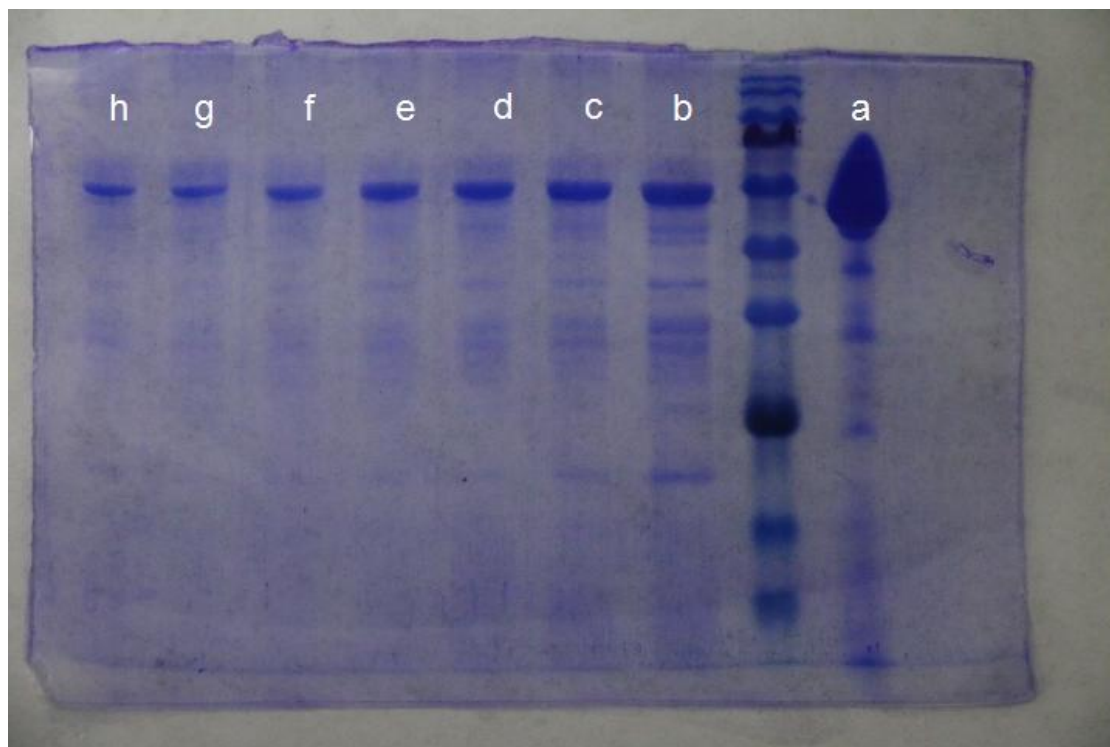

29

30 **Fig. S4:** Induced expression of *amyS* gene in *E.coli* BL21(DE3) strain. The strain was  
31 cultured to  $10^5$  cfu/mL and supplemented with 100  $\mu$ mol/L IPTG for induction culture  
32 at 22°C for 6 h. Then subsequently centrifugated and subjected to ultrasonication. 20  
33 mM imidazole solution was used for a Ni column purification, and obtained the  
34 purified protein. (a) represent the commercial  $\alpha$ -amylase(Ruibio, Germany); (b)  
35 represent unpurified AmyS protein; (c) represent purified AmyS protein; (d) represent  
36 the purified protein was diluted twice-fold; (e) represent the purified protein was  
37 diluted three-fold; (f) represent the purified protein was diluted four-fold; (g)  
38 represent the purified protein was diluted five-fold; (h) represent the purified protein  
39 was diluted six-fold.

40

41

42

43

44

45 **Table S1:** The primers used in this study

| Primer name                                     | Alignment (5'→3')                                  |
|-------------------------------------------------|----------------------------------------------------|
| <i>amyC</i> -up- <i>Bam</i><br>HI-s             | ACACGGATCCTAAATGCAGTTAAAGCTACGT                    |
| <i>amyC</i> -up- <i>EcoR</i><br>I-a             | CACAGAATTCTAATTGTAAGAATATTATACCA                   |
| <i>amyC</i> -down- <i>E</i><br><i>coRI</i> -s   | ACACGAATTCCTTTCTAATTGCAGTTAAAAGGA                  |
| <i>amyC</i> -down- <i>X</i><br><i>hoI</i> -a    | CACACTCGAGTATTAATACTTTTTTCATATTC                   |
| <i>amyP</i> -up- <i>Bam</i><br>HI-s             | ACACGGATCCTTGTA AAAATAGATATATTGATA                 |
| <i>amyP</i> -up- <i>EcoR</i><br>I-a             | CACAGAATTCAATTAACGTTGTTCCCATTCAC                   |
| <i>amyP</i> -down- <i>Ec</i><br><i>oRI</i> -s   | ACACGAATTCAGTTGTA AAAATGGCAA ACTGCA                |
| <i>amyP</i> -down- <i>X</i><br><i>hoI</i> -a    | CACACTCGAGTCAATAAAGTTTCTGCAATATC                   |
| <i>amyS</i> -up- <i>Bam</i><br>HI-s             | ACACGGATCCACCATCAATTCCACCATTTACA                   |
| <i>amyS</i> -up- <i>HinD</i><br>III-a           | CACAAAGCTTGATCAGTTTCCATATATGTTCA                   |
| <i>amyS</i> -down- <i>Hi</i><br><i>nDIII</i> -s | ACACAAGCTTTGTTATTCTTTTAAACATCTG                    |
| <i>amyS</i> -down- <i>Ec</i><br><i>oRI</i> -a   | CACAGAATTCCTCAGTTAGTTTTACAATAAGAG                  |
| <i>PamyS</i> - <i>Bam</i> HI<br>-s              | ACACGGATCCCCATTGCGTACATAATGTTAGATA                 |
| <i>PamyS</i> - <i>amyS</i> -a                   | TATGCTTTACTCCCCTCATA CATCTGTACACCATCCCCTTCCA<br>AG |

---

*amyS*-P*amyS*-s AAGGGGATGGTGTACAGATGTATGAGGGGAGTAAAGCATAT

G

*amyS*-*Xho*I-a CACTCGAGTTATTGTTGAACATATATGGAAACTGATC

*amySec*-*Bam*H ACACGGATCCATGTTTAAAAGAATAACAATAGTC

I-s

*amyS*-*Xho*I-a CACTCGAGTTATTGTTGAACATATATGGAAACTGATC

pET28a-*amyS*- ACACGGATCCATGTATGAGGGGAGTAAAGCATATG

*Bam*HI-s

*amyS*-*Xho*I-a CACTCGAGTTATTGTTGAACATATATGGAAACTGATC

---

46

47
